# Supplementary material for: An Exploratory Cross-Country Analysis of Female Entrepreneurial Activity: The Roles of Gendered Institutions
Source: publisher site journal article supplement (doi:10.1515/erj-2018-0019), 2019-06-22
Supplement: Supplementary file 1 [file Appendix.pdf › Appendix.pdf]

## Appendix

Details of Sample countries.

| Code   | Country        | Code   | Country   | Code   | Country     | Code   | Country             |
|--------|----------------|--------|-----------|--------|-------------|--------|---------------------|
| 1. DZ  | Algeria        | 17. FR | France    | 33. LU | Luxembourg  | 49. SK | Slovakia            |
| 2. AO  | Angola         | 18. DE | Germany   | 34. MW | Malawi      | 50. SI | Slovenia            |
| 3. AR  | Argentina      | 19. GH | Ghana     | 35. MY | Malaysia    | 51. ZA | South Africa        |
| 4. BB  | Barbados       | 20. GR | Greece    | 36. MX | Mexico      | 52. ES | Spain               |
| 5. BE  | Belgium        | 21. GT | Guatemala | 37. NA | Namibia     | 53. SE | Sweden              |
| 6. BW  | Botswana       | 22. HU | Hungary   | 38. NL | Netherlands | 54. SW | Switzerland         |
| 7. BR  | Brazil         | 23. IN | India     | 39. NG | Nigeria     | 55. TH | Thailand            |
| 8. CA  | Canada         | 24. ID | Indonesia | 40. NO | Norway      | 56. TT | Trinidad and Tobago |
| 9. CL  | Chile          | 25. IR | Iran      | 41. PA | Panama      | 57. TR | Turkey              |
| 10. CN | China          | 26. IE | Ireland   | 42. PE | Peru        | 58. UG | Uganda              |
| 11. CO | Colombia       | 27. IL | Israel    | 43. PH | Philippines | 59. UK | United Kingdom      |
| 12. HR | Croatia        | 28. IT | Italy     | 44. PL | Poland      | 60. US | United States       |
| 13. CZ | Czech Republic | 29. JM | Jamaica   | 45. PT | Portugal    | 61. UY | Uruguay             |
| 14. EC | Ecuador        | 30. KR | Korea (S) | 46. RO | Romania     | 62. VN | Vietnam             |
| 15. EE | Estonia        | 31. LV | Latvia    | 47. RU | Russia      | 63. ZM | Zambia              |
| 16. FI | Finland        | 32. LT | Lithuania | 48. SG | Singapore   |        |                     |
